# Supplementary material for: Toward Best Practices for Controlling Mammalian Cell Culture Environments
Source: Front Cell Dev Biol. 2022 Feb 21;10:788808. doi: 10.3389/fcell.2022.788808 (PMC8900666; doi:10.3389/fcell.2022.788808)
Supplement: Supplementary file 3 [file DataSheet3.xlsx]

## Sheet: Sheet1
Journal Name	Impact Factor	Year	Standardized declaration of reporting practices for mammalian cells?	Attachment/ Link to reporting guidelines
Cell	38.637	2019-2020	Yes	https://www.cell.com/pb-assets/journals/research/cell/methods/Methods%20Guide.pdf
Cell Cancer Cell	26.602	2019	Yes	https://www.cell.com/pb-assets/journals/research/cell/methods/Methods%20Guide.pdf
Cell Research	20.507	2020	Yes	https://www.nature.com/documents/cr-gta.pdf
Cell Stem Cell	20.86	2019	Yes	https://www.cell.com/pb-assets/journals/research/cell/methods/Methods%20Guide.pdf
Developmental Cell	10.092	2019-2020	Yes	https://www.cell.com/pb-assets/journals/research/cell/methods/Methods%20Guide.pdf
EMBO	9.96	2019	Yes	https://www.embopress.org/page/journal/14602075/authorguide#livingorganisms
Genes and Development	9.527	2019-2020	No	http://genesdev.cshlp.org/site/misc/ifora.xhtml
Journal of Biological Chemistry	4.19	2019-2020	No	https://www.jbc.org/content/authorinfo#idp2931184
Molecular Cell	15.584	2019-2020	Yes	https://www.cell.com/pb-assets/journals/research/cell/methods/Methods%20Guide.pdf
Nature	42.779	2020	Yes	https://www.nature.com/nature-research/editorial-policies/reporting-standards
Nature Biotechnology	36.558	2019	Yes	https://www.nature.com/documents/nr-editorial-policy-checklist.pdf
Nature Cell biology	20.042	2020	Yes	https://www.nature.com/documents/nr-editorial-policy-checklist.pdf
Nature Communications	12.121	2020	Yes	https://www.nature.com/documents/nr-editorial-policy-checklist.pdf
Nature Genetics	27.605	2019-2020	Yes	https://www.nature.com/nature-portfolio/editorial-policies/reporting-standards
Nature Medicine	36.13	2019-2020	Yes	https://www.nature.com/nature-research/editorial-policies/reporting-standards
PNAS	9.41	2020	No	https://blog.pnas.org/iforc.pdf
Science	41.846	2020	Yes	https://www.sciencemag.org/authors/science-journals-editorial-policies#research-standards
